# Supplementary material
Source: PubMed Central journal article supplement (PMC6689094)
Supplement: mmc1.pdf [file mmc1.pdf]

# Classification of Cough as a Symptom in Adults and Management Algorithms

## CHEST Guideline and Expert Panel Report

*Richard S. Irwin, MD, Master FCCP; Cynthia L. French, PhD, RN, ANP-BC, FCCP;  
Anne B. Chang, MBBS, PhD, MPH; Kenneth W. Altman, MD, PhD;  
on behalf of the CHEST Expert Cough Panel*

CHEST 2018; 153(1):196-209

*Online supplements are not copyedited prior to posting and the author(s) take full responsibility for the accuracy of all data.*

© 2017 AMERICAN COLLEGE OF CHEST PHYSICIANS. Reproduction of this article is prohibited without written permission from the American College of Chest Physicians. See online for more details. DOI: 10.1016/j.chest.2017.10.016

| <b>e-Table 1. Acute &amp; Subacute Cough Classification PubMed &amp; Scopus Searches Nov 12, 2014</b> |            |                                                                                                                                                                                                                                                                                          |
|-------------------------------------------------------------------------------------------------------|------------|------------------------------------------------------------------------------------------------------------------------------------------------------------------------------------------------------------------------------------------------------------------------------------------|
| <b>Systematic Review Searches<br/>Cochrane Reviews:</b>                                               |            | <p><b>PubMed</b> – For the 2 PubMed searches, the subset filter of “AND systematic[sb]” was applied.</p> <p>Additional searches in the Cochrane Database of Systematic Reviews (Wiley) were performed for “<i>acute cough</i>” [all text] and for “<i>subacute cough</i>” [all text]</p> |
| <b>PubMed Search #1</b>                                                                               |            | "acute cough"                                                                                                                                                                                                                                                                            |
|                                                                                                       | <b>NOT</b> | (letter[pt] OR comment[pt] OR editorial[pt] OR case reports[pt])                                                                                                                                                                                                                         |
|                                                                                                       |            | <i>Filters:</i> English                                                                                                                                                                                                                                                                  |
| <b>PubMed Search# 2</b>                                                                               |            | "subacute cough"                                                                                                                                                                                                                                                                         |
|                                                                                                       | <b>NOT</b> | (letter[pt] OR comment[pt] OR editorial[pt] OR case reports[pt])                                                                                                                                                                                                                         |
|                                                                                                       |            | <i>Filters:</i> English                                                                                                                                                                                                                                                                  |
| <b>Scopus Search</b>                                                                                  |            | TITLE-ABS-KEY("acute cough" OR "subacute cough" AND ( LIMIT-TO(DOCTYPE,"ar" ) OR LIMIT-TO(DOCTYPE,"re" ) OR LIMIT-TO(DOCTYPE,"cp" )) AND ( LIMIT-TO(LANGUAGE,"English" )) AND NOT DBCOLL(medl)                                                                                           |
| <b>February 23 2016 Update to Search</b>                                                              |            | Repeat of original search in PubMed December 2014 to February 23, 2016; in Scopus, January 2014 to February 23, 2016.                                                                                                                                                                    |

| <b>e-Table 2. Chronic Cough Classification PubMed &amp; Scopus Searches July 31, 2014</b> |            |                                                                                                                                                                                                                                                                                                                                                                                                                             |
|-------------------------------------------------------------------------------------------|------------|-----------------------------------------------------------------------------------------------------------------------------------------------------------------------------------------------------------------------------------------------------------------------------------------------------------------------------------------------------------------------------------------------------------------------------|
| <b>PubMed Search# 1</b><br><i>(captures non-indexed records)</i>                          |            | ("chronic cough" OR "idiopathic cough" OR "refractory cough" OR "unresponsive cough" OR "intractable cough" OR "psychogenic cough" OR "unresolved cough" OR "unexplained cough" OR "persistent cough") NOT (child OR children) AND ((publisher[sb] NOT pubstatusnihms NOT pubstatuspmcsd NOT pmcbook) OR inprocess[sb] OR pubmednotmedline[sb] OR oldmedline[sb] OR ((pubstatusnihms OR pubstatuspmcsd) AND publisher[sb])) |
|                                                                                           | <b>NOT</b> | (letter[pt] OR comment[pt] OR editorial[pt] OR case reports[pt])                                                                                                                                                                                                                                                                                                                                                            |
|                                                                                           |            | <i>Filters:</i> English; Adult: 19+years                                                                                                                                                                                                                                                                                                                                                                                    |
| <b>PubMed Search# 2</b><br><i>(for MEDLINE indexed records)</i>                           |            | ("chronic cough" OR "idiopathic cough" OR "refractory cough" OR "unresponsive cough" OR "intractable cough" OR "psychogenic cough" OR "unresolved cough" OR "unexplained cough" OR "persistent cough") NOT (letter[pt] OR comment[pt] OR editorial[pt] OR case reports[pt])                                                                                                                                                 |
|                                                                                           | <b>NOT</b> | (letter[pt] OR comment[pt] OR editorial[pt] OR case reports[pt])                                                                                                                                                                                                                                                                                                                                                            |
|                                                                                           |            | ("chronic cough" OR "idiopathic cough" OR "refractory cough" OR "unresponsive cough" OR "intractable cough" OR "psychogenic cough" OR "unresolved cough" OR "unexplained cough" OR "persistent cough") NOT (letter[pt] OR comment[pt] OR editorial[pt] OR case reports[pt])                                                                                                                                                 |
| <b>Scopus Search</b>                                                                      |            | TITLE-ABS-KEY("chronic cough" OR "idiopathic cough" OR "refractory cough" OR "unresponsive cough" OR "intractable cough" OR "psychogenic cough" OR "unresolved cough" OR "unexplained cough" OR "persistent cough") AND NOT (child OR children) AND ( LIMIT-TO(DOCTYPE,"ar" ) OR LIMIT-TO(DOCTYPE,"re" ) OR LIMIT-TO(DOCTYPE,"cp" )) AND ( LIMIT-TO(LANGUAGE,"English" )) AND NOT DBCOLL(medl)                              |
| <b>February 23, 2016 update to search</b>                                                 |            | Repeat of original search in PubMed August 2014 to February 23, 2016; in Scopus, January 2014 to February 23, 2016.                                                                                                                                                                                                                                                                                                         |
